# Supplementary material for: Improvement of Growth, Yield, Seed Production and Phytochemical Properties of Satureja khuzistanica Jamzad by Foliar Application of Boron and Zinc
Source: MDPI journal article supplement (doi:10.3390/plants10112469), 2021-11-16
Supplement: s1 [file s1]

**Table S1. Climatic conditions of *S. khuzistanica* cultivation area for both cropping years.**

|             | Average Minimum Temperature (°C) | Average Maximum Temperature (°C) | Average Monthly Temperature (°C) | Average Monthly Rainfall (mm) | Average Percentage of Relative Humidity | Average Minimum Temperature (°C) | Average Maximum Temperature (°C) | Average Monthly Temperature (°C) | Average Monthly Rainfall (mm) | Average Percentage of Relative Humidity |
|-------------|----------------------------------|----------------------------------|----------------------------------|-------------------------------|-----------------------------------------|----------------------------------|----------------------------------|----------------------------------|-------------------------------|-----------------------------------------|
| First year  | First year                       |                                  |                                  |                               |                                         |                                  |                                  |                                  |                               |                                         |
|             | April                            |                                  |                                  |                               |                                         | May                              |                                  |                                  |                               |                                         |
|             | 7.99                             | 21.83                            | 14.91                            | 6.50                          | 63                                      | 11.98                            | 26.38                            | 19.18                            | 1.88                          | 60                                      |
|             | First year                       |                                  |                                  |                               |                                         |                                  |                                  |                                  |                               |                                         |
|             | June                             |                                  |                                  |                               |                                         | July                             |                                  |                                  |                               |                                         |
|             | 16.42                            | 36.64                            | 26.53                            | 0.28                          | 31                                      | 21.8                             | 41.62                            | 31.7                             | 0                             | 15                                      |
|             | First year                       |                                  |                                  |                               |                                         |                                  |                                  |                                  |                               |                                         |
|             | August                           |                                  |                                  |                               |                                         | September                        |                                  |                                  |                               |                                         |
|             | 19.66                            | 41.25                            | 30.46                            | 0                             | 15                                      | 16.46                            | 36.49                            | 26.47                            | 0.086                         | 19                                      |
| Second year | Second year                      |                                  |                                  |                               |                                         |                                  |                                  |                                  |                               |                                         |
|             | April                            |                                  |                                  |                               |                                         | May                              |                                  |                                  |                               |                                         |
|             | 6.98                             | 20.28                            | 13.63                            | 6.411                         | 61                                      | 12.04                            | 30.67                            | 21.35                            | 0.189                         | 45                                      |
|             | Second year                      |                                  |                                  |                               |                                         |                                  |                                  |                                  |                               |                                         |
|             | June                             |                                  |                                  |                               |                                         | July                             |                                  |                                  |                               |                                         |
|             | 18.16                            | 38.28                            | 28.22                            | 0                             | 24                                      | 20.13                            | 40.36                            | 30.24                            | 0                             | 22                                      |
|             | Second year                      |                                  |                                  |                               |                                         |                                  |                                  |                                  |                               |                                         |
|             | August                           |                                  |                                  |                               |                                         | September                        |                                  |                                  |                               |                                         |
|             | 21.29                            | 41.22                            | 31.25                            | 0                             | 19                                      | 15.36                            | 36.21                            | 25.78                            | 0                             | 20                                      |

**Table S2. Analysis of variance of the effect of boron and zinc foliar application on biomass and yield attributes of *S. khuzistanica* in the first year of the experiment.**

| SOV         | Df | Plant Height       | Canopy Diameter     | Number of Main Branches | Number of Sub-Branches | Plant Fresh Weight  | Plant Dry Weight    | Stem Dry Weight     | Drug Yield         | Leaf/ Stem         |
|-------------|----|--------------------|---------------------|-------------------------|------------------------|---------------------|---------------------|---------------------|--------------------|--------------------|
| Replication | 2  | 5.65 <sup>ns</sup> | 61.87 <sup>ns</sup> | 7.75*                   | 15.47 <sup>ns</sup>    | 15.26 <sup>ns</sup> | 0.19 <sup>ns</sup>  | 10.07 <sup>ns</sup> | 2.79 <sup>ns</sup> | 0.55 <sup>ns</sup> |
| Boron       | 2  | 3.05 <sup>ns</sup> | 4.33 <sup>ns</sup>  | 1.02 <sup>ns</sup>      | 12.29 <sup>ns</sup>    | 2952.88**           | 447.59**            | 27.47*              | 233.99**           | 0.137*             |
| Zn          | 2  | 22.01**            | 2.527 <sup>ns</sup> | 1.35 <sup>ns</sup>      | 109.37*                | 343.02*             | 79.50**             | 7.18 <sup>ns</sup>  | 31.63*             | 0.13 <sup>ns</sup> |
| Boron*Zinc  | 6  | 11.22*             | 43.76 <sup>ns</sup> | 2.26 <sup>ns</sup>      | 4.78 <sup>ns</sup>     | 38.25 <sup>ns</sup> | 22.73 <sup>ns</sup> | 12.84 <sup>ns</sup> | 2.35 <sup>ns</sup> | 0.02 <sup>ns</sup> |
| Error       | 22 | 1.81               | 15.42               | 0.86                    | 13.29                  | 53.96               | 7.51                | 4.924               | 4.13               | 0.021              |

R: replication, ns: not significant; \* and \*\* Significantly at the probability level of P <0.05 and P <0.01, respectively

**Table S3. Analysis of variance of the effect of boron and zinc foliar application on biomass and yield attributes of *S. khuzistanica* in the second year of the experiment.**

| SOV         | Df | Plant Height         | Canopy Diameter      | Number of Main Branches | Number of Sub-Branches | Plant Fresh Weight    | Plant Dry Weight       | Stem Dry Weight       | Drug Yield            | Leaf/ Stem          |
|-------------|----|----------------------|----------------------|-------------------------|------------------------|-----------------------|------------------------|-----------------------|-----------------------|---------------------|
| Replication | 2  | 9.25 <sup>ns</sup>   | 139.46 <sup>ns</sup> | 141.36*                 | 483.28 <sup>ns</sup>   | 8007.46 <sup>ns</sup> | 1478.063 <sup>ns</sup> | 308.436 <sup>ns</sup> | 761.945 <sup>ns</sup> | 0.368 <sup>ns</sup> |
| Boron       | 2  | 79.694*              | 1178.69**            | 115.11*                 | 2716.028*              | 42453.48**            | 8374.498**             | 3397.227**            | 1159.578*             | 1.489 <sup>ns</sup> |
| Zn          | 2  | 40.444 <sup>ns</sup> | 360.88 <sup>ns</sup> | 188.86**                | 323.528 <sup>ns</sup>  | 30837.86**            | 5603.786**             | 1119.7**              | 1840.029*             | 0.187 <sup>ns</sup> |
| Boron*Zinc  | 6  | 16.222 <sup>ns</sup> | 151.97 <sup>ns</sup> | 9.263 <sup>ns</sup>     | 343.347 <sup>ns</sup>  | 764.8 <sup>ns</sup>   | 186.21 <sup>ns</sup>   | 216.919 <sup>ns</sup> | 73.71 <sup>ns</sup>   | 0.37 <sup>ns</sup>  |
| Error       | 22 | 15.593               | 150.45               | 25.017                  | 507.507                | 4269.43               | 736.29                 | 110.177               | 450.1                 | 0.1278              |

R: replication, ns: not significant; \* and \*\* Significantly at the probability level of P <0.05 and P <0.01, respectively

**Table S4. Analysis of variance of the effect of boron and zinc foliar application on seed traits and B and Zn contents of leaf of *S. khuzistanica* in the first year of the experiment.**

| SOV         | Df | Seed Yield            | Seed Germination     | 1000-Seed Weight      | Seed Emptiness      | Boron Concentration | Zinc Concentration  |
|-------------|----|-----------------------|----------------------|-----------------------|---------------------|---------------------|---------------------|
| Replication | 2  | 0.00054*              | 0.802 <sup>ns</sup>  | 0.058*                | 0.04 <sup>ns</sup>  | 13.94 <sup>ns</sup> | 2.102 <sup>ns</sup> |
| Boron       | 2  | 0.00395**             | 453.48**             | 0.2399**              | 28.492**            | 200.33**            | 3.564 <sup>ns</sup> |
| Zn          | 2  | 0.00164*              | 110.486**            | 0.0929*               | 3.945 <sup>ns</sup> | 0.37 <sup>ns</sup>  | 230.98**            |
| Boron*Zinc  | 6  | 0.00002 <sup>ns</sup> | 28.439 <sup>ns</sup> | 0.00715 <sup>ns</sup> | 0.876 <sup>ns</sup> | 2.62 <sup>ns</sup>  | 0.688 <sup>ns</sup> |
| Error       | 22 | 0.000086              | 16.658               | 0.010328              | 8.438               | 6.347               | 7.713               |

R: replication, ns: not significant; \* and \*\* Significantly at the probability level of P <0.05 and P <0.01, respectively

**Table S5. Analysis of variance of the effect of boron and zinc foliar application on seed traits and B and Zn contents of leaf of *S. khuzistanica* in the second year of the experiment.**

| Sov         | Df | Seed Yield            | Seed Germination       | 1000-Seed Weight     | Seed Emptiness       | Boron Concentration  | Zinc Concentration   |
|-------------|----|-----------------------|------------------------|----------------------|----------------------|----------------------|----------------------|
| Replication | 2  | 2.147 <sup>ns</sup>   | 0.000759 <sup>ns</sup> | 0.0714 <sup>**</sup> | 0.664 <sup>ns</sup>  | 13.85 <sup>ns</sup>  | 2.815 <sup>ns</sup>  |
| Boron       | 2  | 497.747 <sup>**</sup> | 0.03623 <sup>**</sup>  | 0.294 <sup>**</sup>  | 64.943 <sup>**</sup> | 198.38 <sup>**</sup> | 5.248 <sup>ns</sup>  |
| Zn          | 2  | 116.53 <sup>**</sup>  | 0.0269 <sup>**</sup>   | 0.1023 <sup>**</sup> | 6.937 <sup>ns</sup>  | 0.3319 <sup>ns</sup> | 251.41 <sup>**</sup> |
| Boron*Zinc  | 6  | 15.837 <sup>ns</sup>  | 0.00145 <sup>ns</sup>  | 0.0074 <sup>ns</sup> | 2.739 <sup>ns</sup>  | 2.416 <sup>ns</sup>  | 0.405 <sup>ns</sup>  |
| Error       | 22 | 14.86                 | 0.000768               | 0.01026              | 8.684                | 5.607                | 7.4733               |

R: replication, ns: not significant; \* and \*\* Significantly at the probability level of P <0.05 and P <0.01, respectively

**Table S6. Analysis of variance of the effect of boron and zinc foliar application on phytochemical traits of *S. khuzistanica* in the first year of the experiment.**

| SOV         | Df | Essential Oil Content | Essential Oil Yield  | Carvacrol            | Total Phenol          | Total Flavonoid      | Flavonoid/Phenol     | FRAP Assay             | DPPH Assay            |
|-------------|----|-----------------------|----------------------|----------------------|-----------------------|----------------------|----------------------|------------------------|-----------------------|
| Replication | 2  | 0.0379 <sup>ns</sup>  | 0.268 <sup>ns</sup>  | 26.334 <sup>ns</sup> | 0.928 <sup>ns</sup>   | 1.0477 <sup>ns</sup> | 0.0855 <sup>ns</sup> | 1535.74 <sup>ns</sup>  | 0.0002 <sup>**</sup>  |
| Boron       | 2  | 0.3715 <sup>**</sup>  | 8.2313 <sup>**</sup> | 61.317 <sup>**</sup> | 561.098 <sup>**</sup> | 63.748 <sup>ns</sup> | 0.0169 <sup>ns</sup> | 21325.404 <sup>*</sup> | 0.0012 <sup>**</sup>  |
| Zn          | 2  | 0.8326 <sup>**</sup>  | 5.2805 <sup>**</sup> | 11.344 <sup>ns</sup> | 107.066 <sup>*</sup>  | 16.450 <sup>ns</sup> | 0.385 <sup>ns</sup>  | 21376.354 <sup>*</sup> | 0.0007 <sup>**</sup>  |
| Boron*Zinc  | 6  | 0.01499 <sup>ns</sup> | 0.0903 <sup>ns</sup> | 6.12 <sup>ns</sup>   | 36.327 <sup>ns</sup>  | 24.043 <sup>ns</sup> | 0.0706 <sup>ns</sup> | 1997.608 <sup>ns</sup> | 0.00014 <sup>ns</sup> |
| Error       | 2  | 0.01978               | 0.07686              | 9.589                | 21.653                | 26.249               | 0.153                | 1869.072               | 0.000052              |

R: replication, ns: not significant; \* and \*\* Significantly at the probability level of P <0.05 and P <0.01, respectively

**Table S7. Analysis of variance of the effect of boron and zinc foliar application on phytochemical traits of *S. khuzistanica* in the second year of the experiment.**

| SOV         | Df | Essential Oil Content | Essential Oil Yield   | Carvacrol           | Total Phenol         | Total Flavonoid      | Flavonoid/Phenol     | FRAP Assay              | DPPH Assay             |
|-------------|----|-----------------------|-----------------------|---------------------|----------------------|----------------------|----------------------|-------------------------|------------------------|
| Replication | 2  | 0.0416 <sup>ns</sup>  | 11.627 <sup>ns</sup>  | 2.387 <sup>ns</sup> | 50.411 <sup>ns</sup> | 4.0670 <sup>ns</sup> | 0.077 <sup>ns</sup>  | 1788.521 <sup>ns</sup>  | 0.00007 <sup>ns</sup>  |
| Boron       | 2  | 0.5508 <sup>**</sup>  | 45.269 <sup>*</sup>   | 0.242 <sup>ns</sup> | 488.33 <sup>**</sup> | 102.427 <sup>*</sup> | 0.013 <sup>ns</sup>  | 21040.352 <sup>**</sup> | 0.00115 <sup>**</sup>  |
| Zn          | 2  | 0.9922 <sup>**</sup>  | 88.462 <sup>**</sup>  | 0.556 <sup>ns</sup> | 95.584 <sup>ns</sup> | 4.7528 <sup>ns</sup> | 0.231 <sup>ns</sup>  | 13250.352 <sup>**</sup> | 0.000248 <sup>*</sup>  |
| Boron*Zinc  | 6  | 0.01418 <sup>ns</sup> | 0.54153 <sup>ns</sup> | 0.802 <sup>ns</sup> | 31.795 <sup>ns</sup> | 33.976 <sup>ns</sup> | 0.0750 <sup>ns</sup> | 2824.164 <sup>ns</sup>  | 0.000098 <sup>ns</sup> |
| Error       | 22 | 0.0251                | 9.445                 | 0.934               | 44.520               | 26.555               | 0.159                | 1389.75                 | 0.000070               |

R: replication, ns: not significant; \* and \*\* Significantly at the probability level of P <0.05 and P <0.01, respectively
